# Supplementary material
Source: PubMed Central journal article supplement (PMC3325794)
Supplement: NIHMS279180-supplement-Supplemental_Figures.pdf [file NIHMS279180-supplement-Supplemental_Figures.pdf]

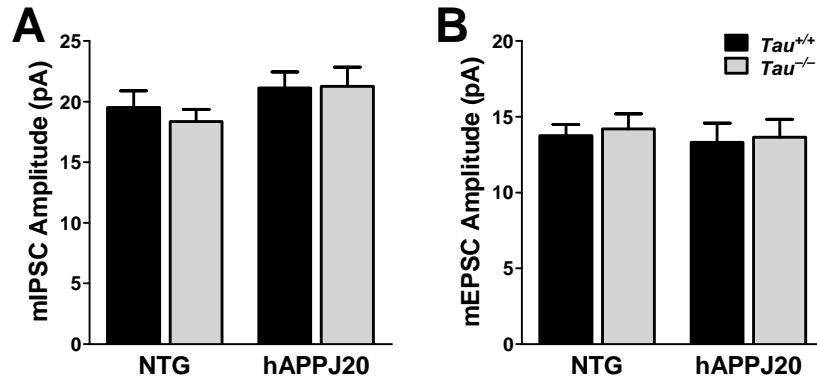

**Supplemental Figure 1.** No differences in miniature postsynaptic potential amplitudes in dentate granule cells across genotypes. Whole-cell recordings were made from acute hippocampal slices. The amplitude of miniature IPSCs (**A**) and mEPSCs (**B**) was unaffected by hAPP/A $\beta$  expression and tau reduction ( $n = 2000$ – $2400$  events from 10–12 cells, 200 events from each, in four mice per genotype).

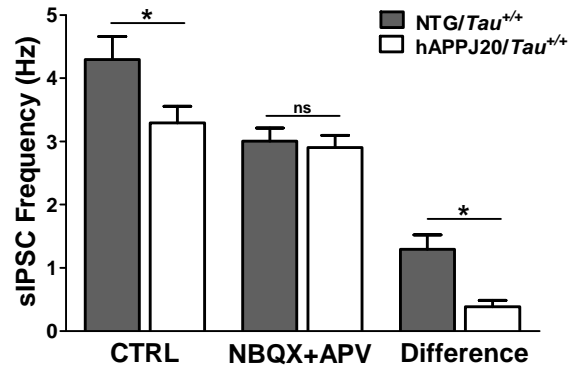

**Supplemental Figure 2.** Reduced excitatory drive onto inhibitory interneurons in hAPPJ20 mice. Whole-cell recordings were made from acute hippocampal slices. In the absence of pharmacological blockers, the frequency of sIPSCs onto granule cells was reduced in hAPPJ20/*Tau*<sup>+/+</sup> cells (CTRL, see also Fig. 9). To determine whether this effect was caused by reduced excitatory drive onto inhibitory interneurons, we blocked excitatory inputs with the AMPA receptor blocker 2,3-dihydroxy-6-nitro-7-sulfamoyl-benzo[f]quinoxaline-2,3-dione (NBQX) and the NMDA receptor blocker (2R)-amino-5-phosphonovaleric acid (APV). In the presence of NBQX+APV, sIPSC frequency did not differ in NTG and hAPPJ20 mice. The difference between sIPSC frequencies recorded under control and NBQX+APV conditions (Difference) reflects the sIPSC component caused by excitatory inputs to inhibitory interneurons and was reduced in hAPPJ20 mice. (\*  $p < 0.05$  by ANOVA;  $n = 10$  cells from three mice per genotype)

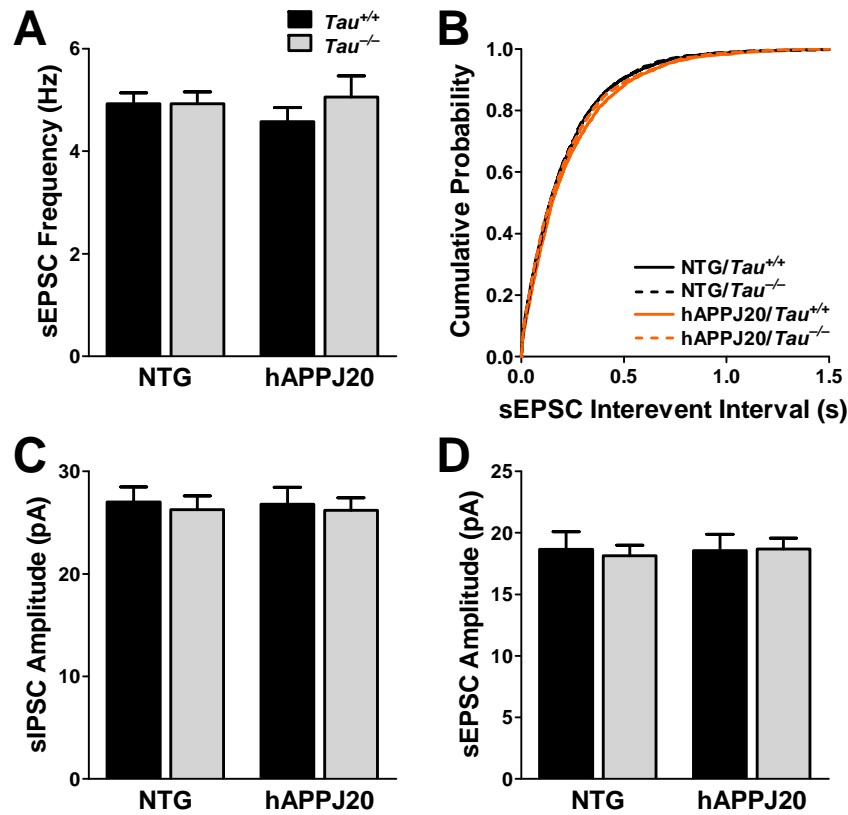

**Supplemental Figure 3.** No differences in sEPSC frequency, sEPSC amplitude, or sIPSC amplitude in dentate granule cells across genotypes. Whole-cell recordings were made from acute hippocampal slices. The frequency (**A,B**) and amplitude (**D**) of sEPSCs and the amplitude of sIPSCs (**C**) were unaffected by hAPP/A $\beta$  expression and tau reduction ( $n = 2800\text{--}3000$  events from 14–15 cells, 200 events from each, in four mice per genotype).

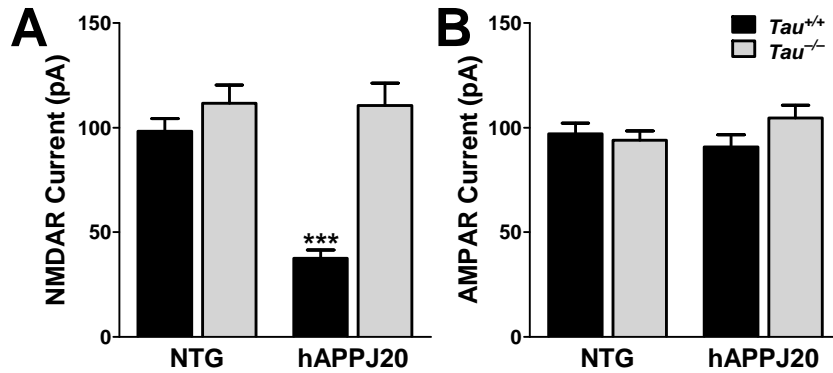

**Supplemental Figure 4.** Tau reduction prevents NMDA receptor dysfunction in dentate granule cells of hAPPJ20 mice. Whole-cell recordings were made from acute hippocampal slices in the presence of picrotoxin. **A**, NMDA receptor (NMDAR)-mediated currents were isolated as described in Methods. Evoked NMDAR currents were decreased in hAPPJ20/ $Tau^{+/+}$  mice but not in hAPPJ20/ $Tau^{-/-}$  mice (hAPP x tau interaction,  $p < 0.0005$  by two-way ANOVA; \*\*\*  $p < 0.001$  vs all other groups by *post hoc* test;  $n = 15-18$  cells from four mice per genotype). **B**, AMPA receptor (AMPA)-mediated currents were isolated as described in Methods. There were no differences between genotypes.

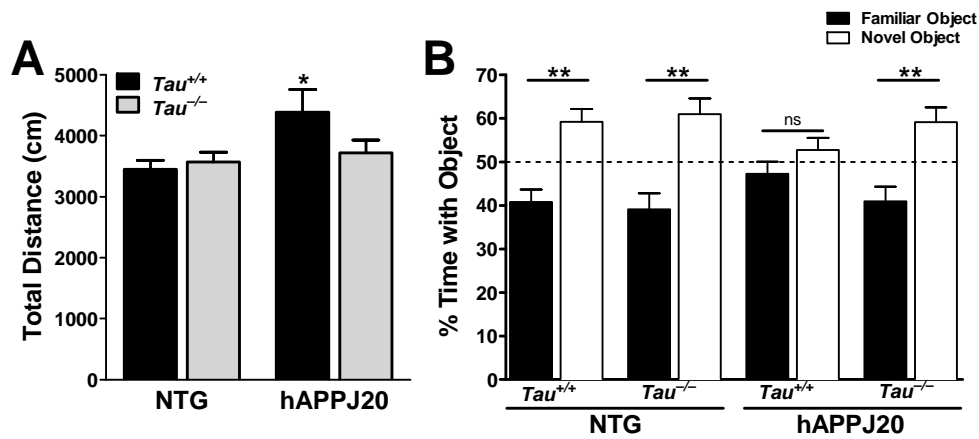

**Supplemental Figure 5.** An independent line of *Tau*-deficient mice is also protected against hAPP/A $\beta$ -induced behavioral deficits. Mice with a GFP knock-in allele replacing the *MAPT* locus (Tucker et al., 2001) were crossed with hAPPJ20 mice. **A**, Elevated plus maze. Tau reduction prevented the hyperactivity typically seen in hAPP/*Tau*<sup>+/+</sup> mice ( $p < 0.05$  by ANOVA; \*  $p < 0.05$  by *post hoc* test;  $n = 10$  mice per genotype; age 4.5–7.5 months). **B**, Novel object recognition test. hAPPJ20/*Tau*<sup>+/+</sup> mice showed no memory of the familiar object. This deficit was also blocked by tau reduction (\*\*  $p < 0.01$  between familiar and novel object;  $n = 10$  mice per genotype; age 4.5–7.5 months).
